# Supplementary material
Source: bioRxiv or medRxiv preprint supplement (https://medrxiv.org/highwire/filestream/86278/field_highwire_adjunct_files/1/2020.06.17.20133348-2.pdf)
Supplement: Supplementary file [file 2020.06.17.20133348-2.pdf]



**Dear Colleagues,**

**From our ISAC IPC group, Andreas and Joost have participated in WHO's Roadmap for COVID-19 meeting with researchers from around the world, as part of the IPC expertise. Our group discussed, among other things, the use and type of PPE in healthcare facilities and the community, and the role of environmental contamination as essential elements concerning COVID-19 prevention.**

**With this survey, we aim to investigate the current practices and opinions concerning prevention of COVID-19. Your contribution will help to inform the current progress of IPC preparedness and the process of prioritization. We would be grateful if you not only participate by completing this survey but also "snowball" it to IPC colleagues from institutions worldwide.**

**Thank you very much for your support and participation**

**On behalf of ISAC-IPC Working Group**

**Andreas and Joost**

**PS. This questionnaire was developed with the help of Andreas Widmer, Benedetta Allegranzi, Ermira Tartari, Kalisvar Marimuthu, Sade (Folasade) Ogunisola, Shuk Ching, and Vincent Cheng**

1. Can your name be mentioned in the acknowledgement?

- Yes
- No
- If yes, please enter your name

2. Can your institution be mentioned in the acknowledgement?

- Yes
- No
- If yes, please enter your institution's name

\* 3. Your country:

\* 4. Your profession:

- Physician
- Nurse
- Pharmacist
- Other (please specify)

\* 5. Healthcare facility sector:

- Public
- Private
- Other (please specify)

\* 6. Your healthcare facility is:

- Primary-level health care facility (few specialities, mainly internal medicine, obstetrics and gynecology, paediatrics, or general surgery; could be referred to as district or rural hospital, limited laboratory services)
- Secondary-level health care facility (more specialities; size could range from 200-800 beds; could be referred to as regional hospital)
- Tertiary-level health care facility (highly specialized services such as cardiology, intensive care unit, special imaging unit; could have 300-1500 beds; could be referred to as teaching hospital or national hospital)
- Other (please specify)

\* 7. Total number of beds in your healthcare facility:

8. Total number of isolation rooms in your healthcare facility:

9. Total number of negative pressure rooms in your healthcare facility

10. Total number or estimate of admissions in your healthcare facility per day:

11. Email address (will only be used if we have further questions)

\* 12. Did your country receive suspected cases of COVID-19?

- Yes
- No

\* 13. Does your country presently have confirmed COVID-19 cases?

- Yes
- No

\* 14. How many COVID-19 cases does your country have (estimate)?

\* 15. Does your institution have one or multiple COVID-19 cases?

- One
- Multiple
- None
- Many (>10)

\* 16. Is there a national COVID-19 guideline in place?

- Yes
- No
- Under development
- Not applicable

**\* 17. The following is applicable to national COVID-19 guidelines (multiple answers possible)**

- The guidelines are applicable to healthcare facilities
- The guidelines are applicable for the community including public domains (i.e airports, public transport, schools etc)
- other, please specify

**\* 18. Is there a regional or local guideline for healthcare facilities affected by COVID-19 cases?**

- Yes
- No
- Under development



\* 19. Does the regional or local COVID-19 guideline for healthcare facilities address personal protective equipment (PPE)?

Yes

No

Not applicable

\* 20. If no, do you adopt any international guidelines wholly or partially?

Yes, WHO guideline

Yes, US, CDC guideline

Yes, public health England guideline

Yes, ECDC guideline

No

\* 21. Is wearing a face mask recommended?

Yes

No



\* 22. Which type of face mask has been recommended?

- Surgical mask
- FFP1
- N95/FFP2
- "Respirators"
- Other (please specify)

\* 23. Is wearing a gown recommended?

- Yes
- No

\* 24. Which type of gown has been recommended?

- Short-sleeved plastic
- Long-sleeved-water-repellant-disposable
- Long-sleeved-water resistant-disposable
- Coverall
- Other (please specify)

\* 25. Is a cap/head-protection recommended?

- Yes
- No

\* 26. Which type of cap/head protection?

- Cap covering the head only
- Cap covering both head and neck

\* 27. Is eye-protection recommended?

- Yes
- No

\* 28. Which type of eye protection is recommended

- Disposable face shield that covers the front and sides of the face/goggles (slightly open to environment)
- "Ski"-goggles (fully-protected)
- Not specified

\* 29. Is the use of gloves recommended?

- Yes-single pair disposable gloves
- Yes-double gloving
- No gloves
- Other type of gloves, please specify

\* 30. Is the use of shoe cover recommended?

- Yes- shoe only cover
- Yes- shoe and lower leg cover
- No shoe cover
- Other types of shoe cover

\* 31. Does your regional or local COVID-19 guidelines stress the importance of strict adherence to hand hygiene?

Yes

No

\* 32. Is the use of PPE recommended for COVID-19 in non-healthcare settings (i.e the community)?

Yes

No

Other (please specify)

\* 33. Is the use of PPE recommended for COVID-19 in outpatient settings when caring for suspected cases?

Yes

No

Other (please specify)

\* 34. Is sufficient stock for PPE currently available in your institution? (can select more than one)

Yes, we don't order extra at the present time

Yes, we have ordered extra

No, we have a shortage of face masks

No, we have a shortage of gowns

Don't know

No, we have a shortage of other PPE (please specify)

Other (please specify)

\* 35. Is the distribution of PPE supplies organized by the government or left over to individual healthcare facilities?

- Organized by the government (e.g Ministry of Health)
- Increasing PPE stock is part of the preparedness plan
- The healthcare facility can order as much as it deems necessary
- Don't know
- Other (please specify)

\* 36. Are you using a chlorine-based surface disinfectant in your institution?

- Yes
- No
- If yes, which type of disinfectant and at what concentration?

\* 37. Are you using a non-touch disinfecting technology (such as UV-C and hydrogen peroxide vaporization) in your institution?

- Yes
- No
- If yes, which technology and at what concentration?

\* 38. Is training on the appropriate and safe use of PPE's being offered for healthcare workers?

- Yes
- No

\* 39. Training is offered on the following (multiple answers are possible)

- What PPE to use
- PPE Donning and Doffing
- When to use PPE
- Waste management
- Just-in-time training for newly deployed staff
- Other (please specify)

**The following set of questions refer to your institution and mainly your personal opinion on preparedness for COVID-19.**

- \* 40. Do you believe that the choices made for the national/regional/local guidelines or the preparedness for COVID-19 were influenced by opinions expressed by the media?
- Agree
- Disagree
- \* 41. Do (you personally) believe that your national/regional/local guidelines for the preparedness for COVID-19 went for maximum security ("yes") or for evidence-based/rational recommendations ("no")?
- Yes
- No
- \* 42. Do you believe that the preparedness of your country in the healthcare setting is sufficient/adequate?
- Agree
- Disagree
- \* 43. Do you believe that the preparedness of your country in the non-healthcare setting is sufficient/adequate?
- Agree
- Disagree
- \* 44. Do you believe that there is a possible over-/miss-use of PPE in your healthcare setting?
- Agree
- Disagree
- \* 45. Do you believe that there is a possible over-/miss-use of PPE in the community?
- Agree
- Disagree
- \* 46. Do you believe that there is a possible over-/miss-use of disinfectants in the community?
- Agree
- Disagree



\* 47. Do you believe that the use and focus on masks creates a misplaced feeling of safety, possibly reducing other IPC measure, such as hand hygiene?

Agree

Disagree
